# Supplementary material
Source: PubMed Central journal article supplement (PMC4167033)

Figure 1a

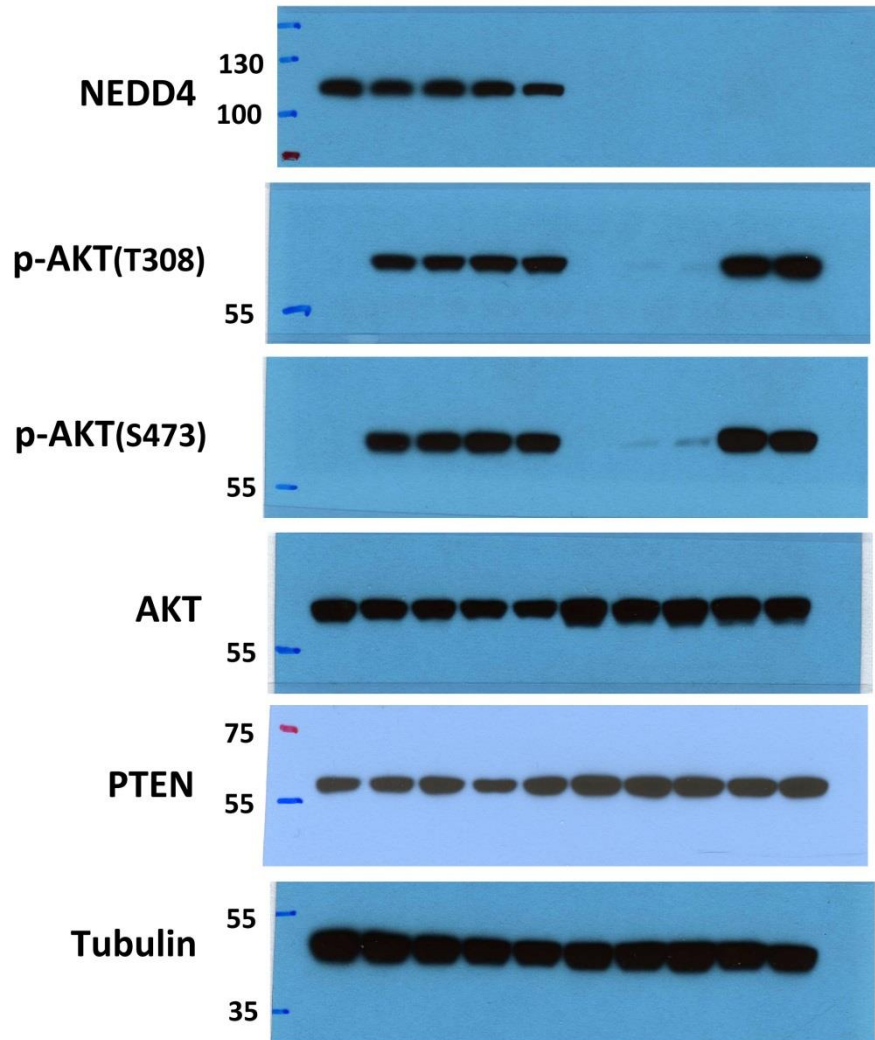

Figure 1b

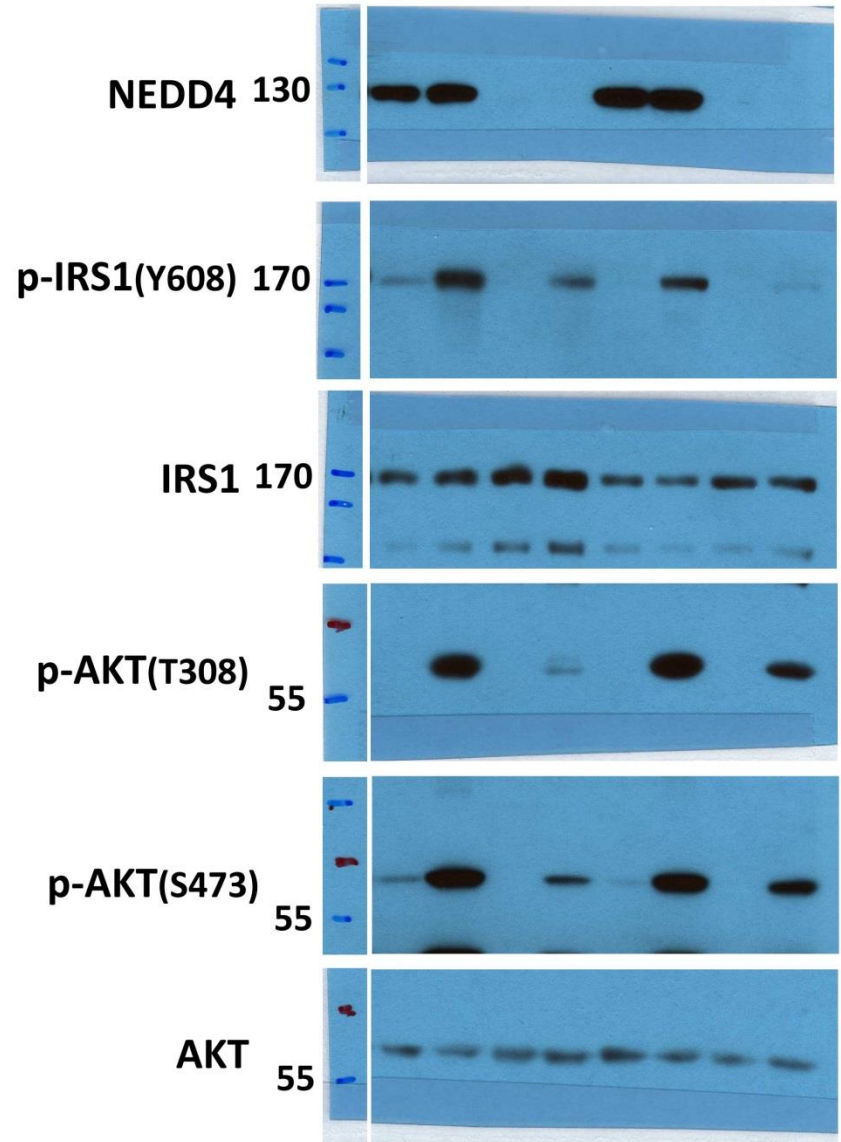

Figure 1c

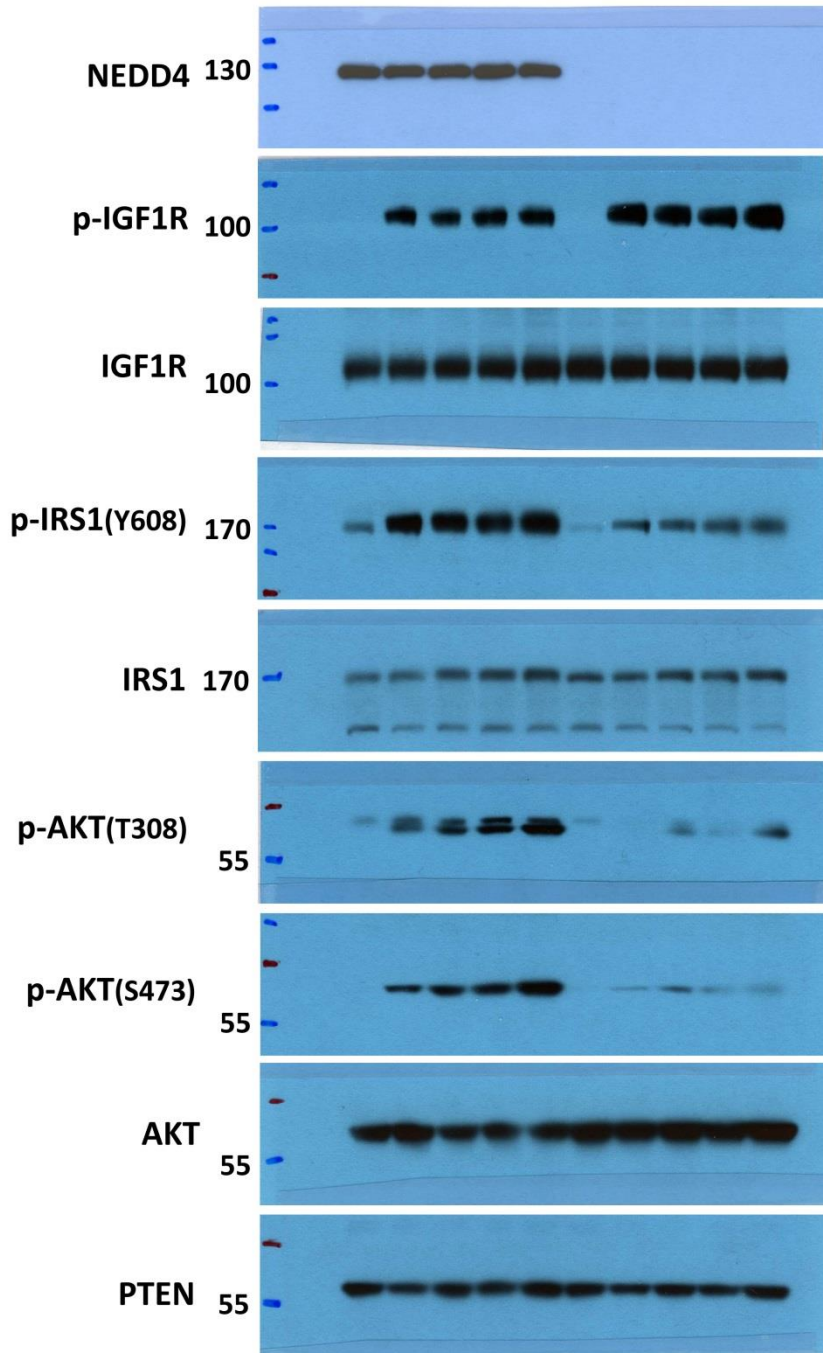

Figure 1d

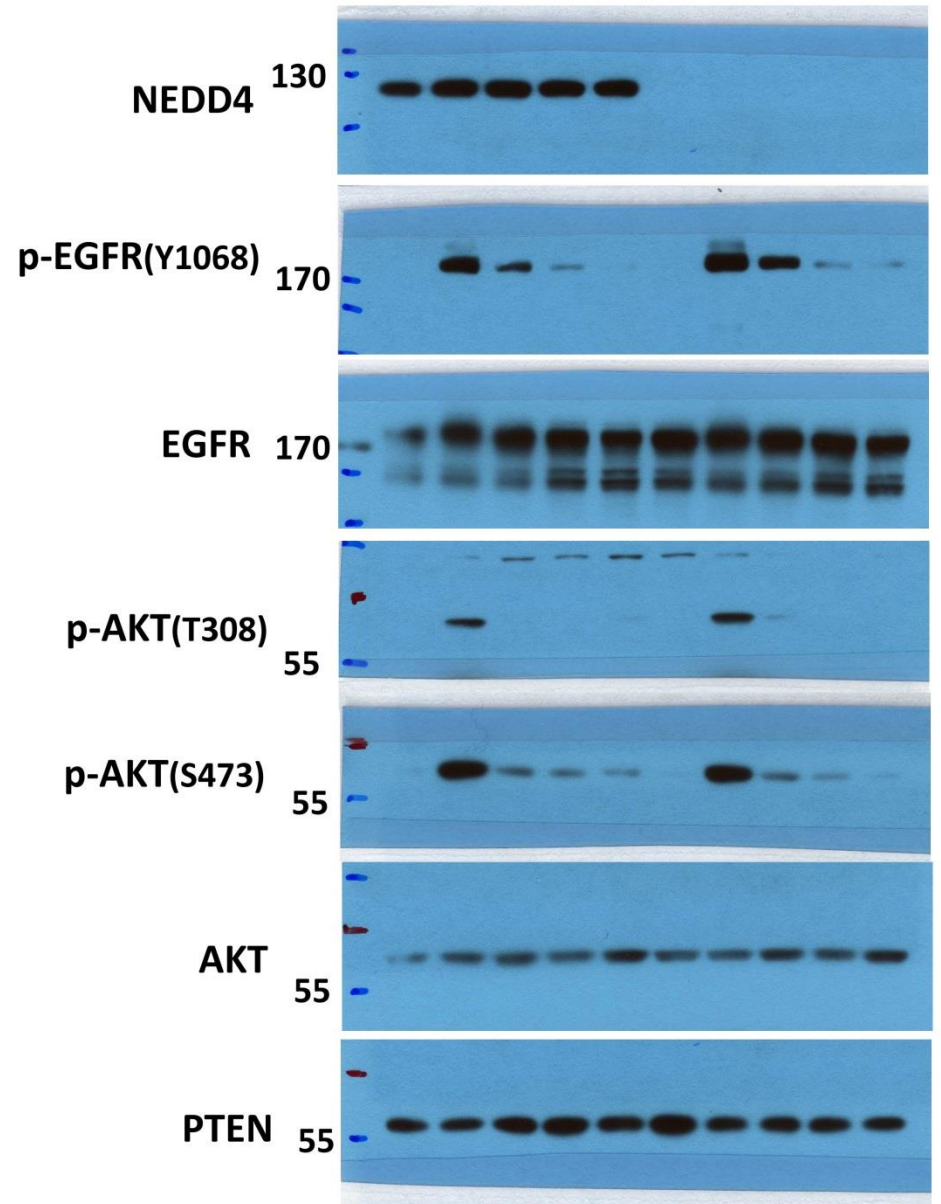



Figure 2a

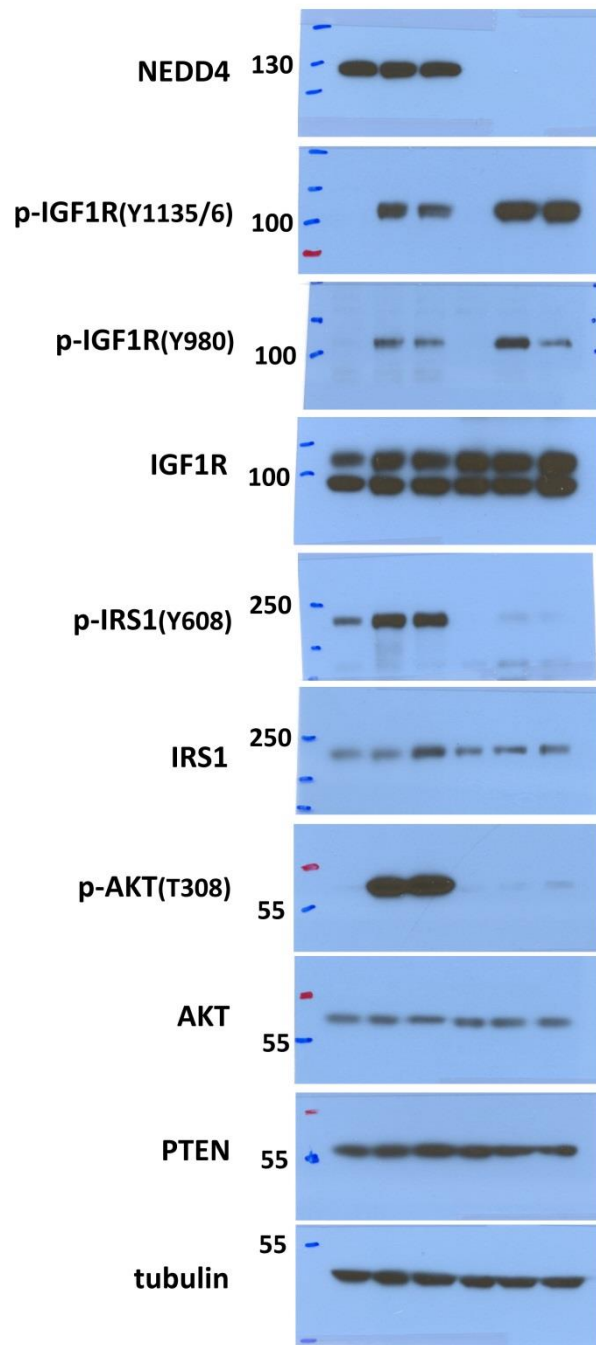

Figure 2b

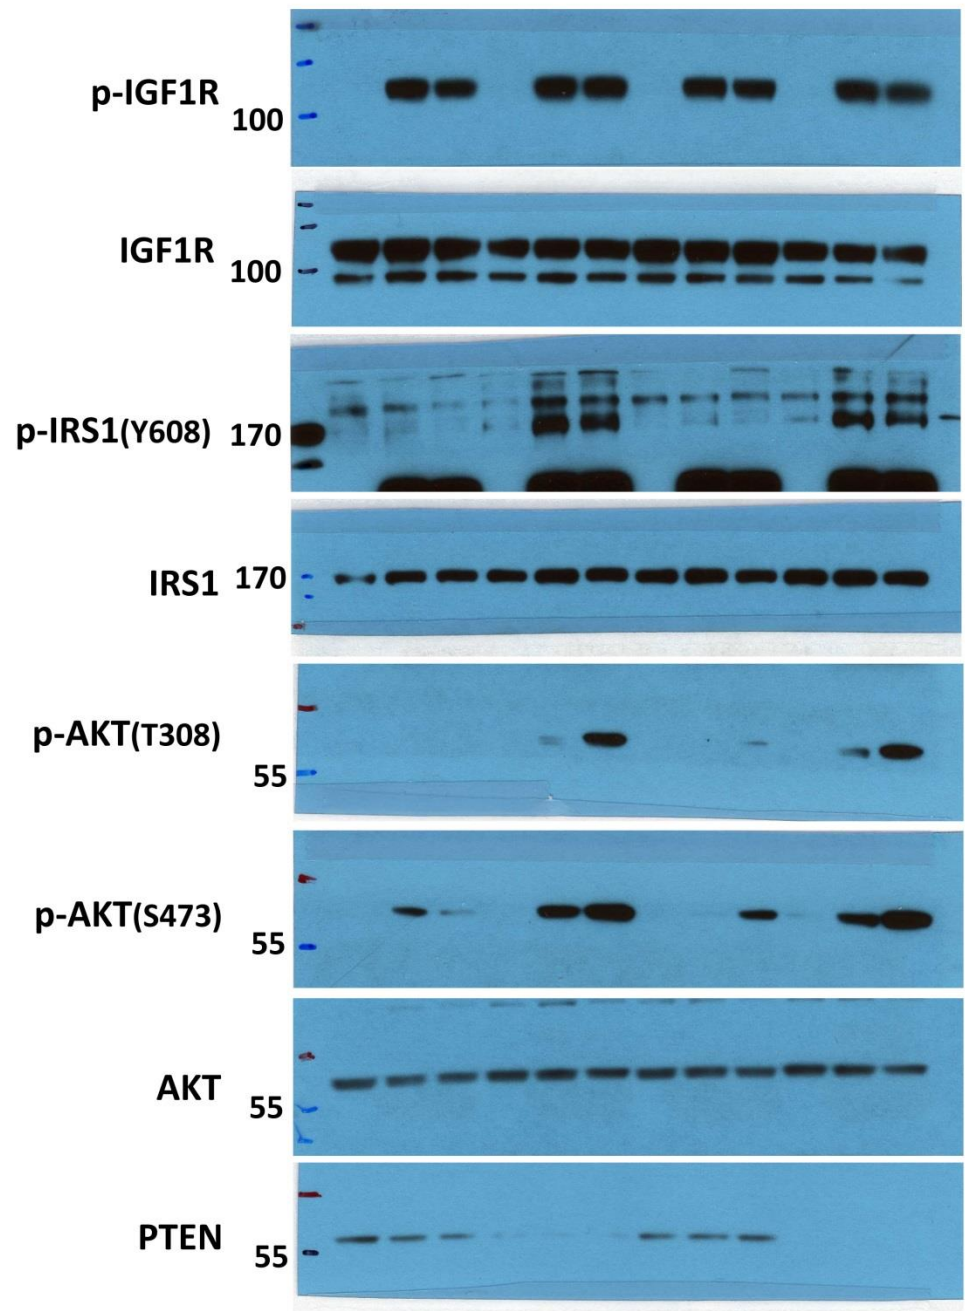

Figure 2c

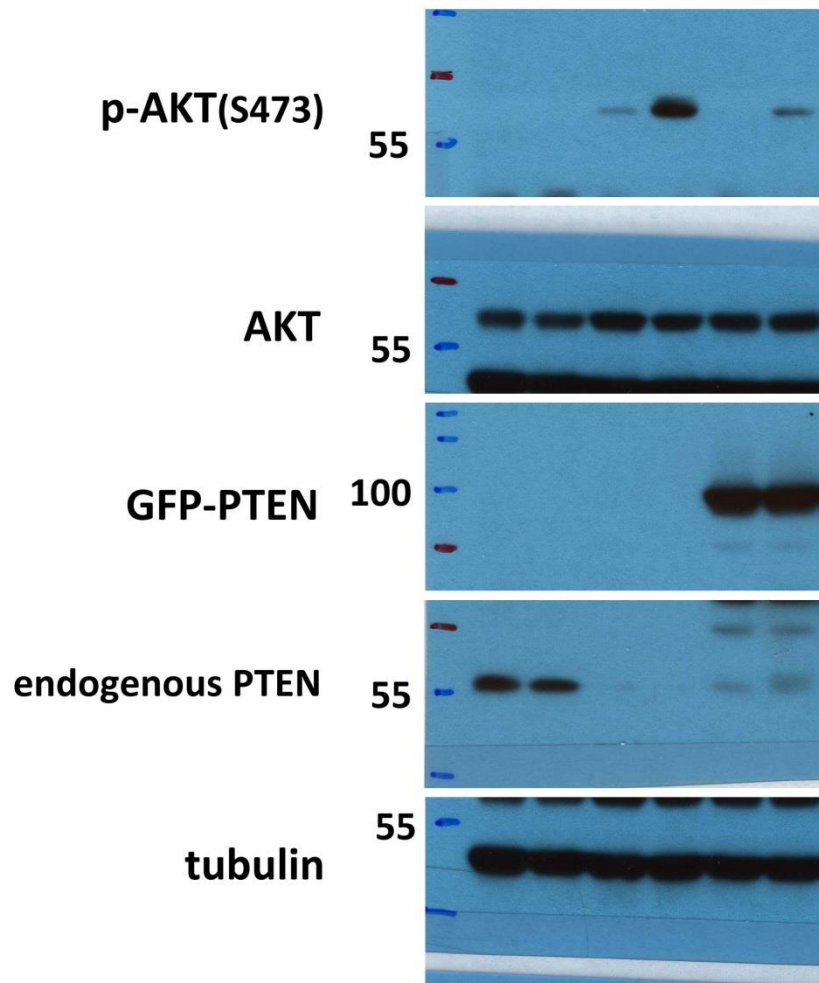

input

IP

Figure 2d

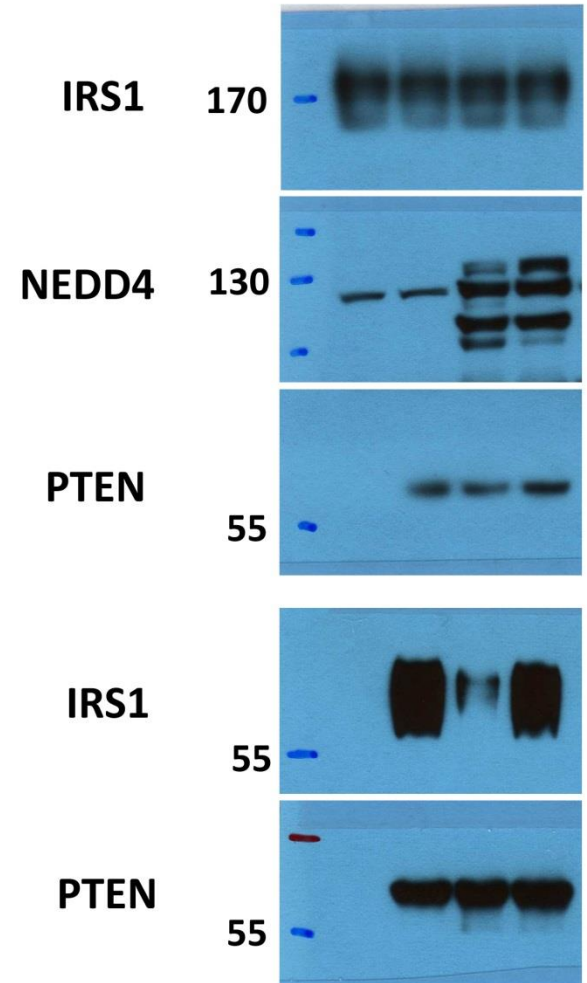

Figure 3b

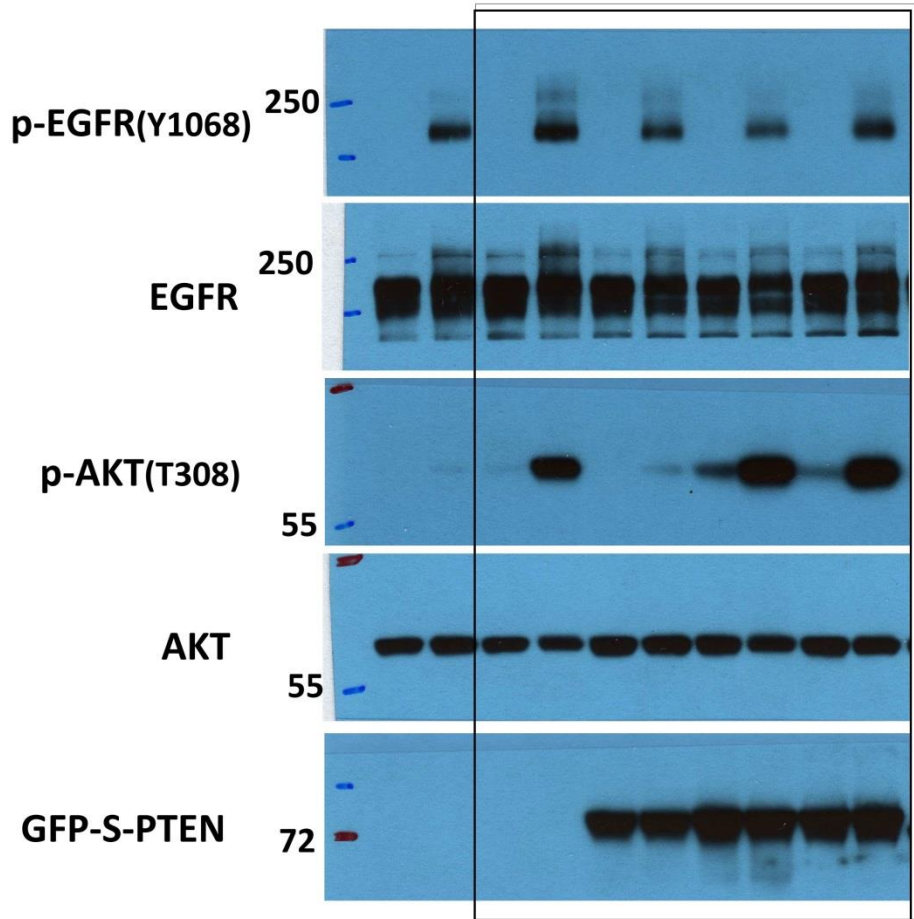

Figure 3c

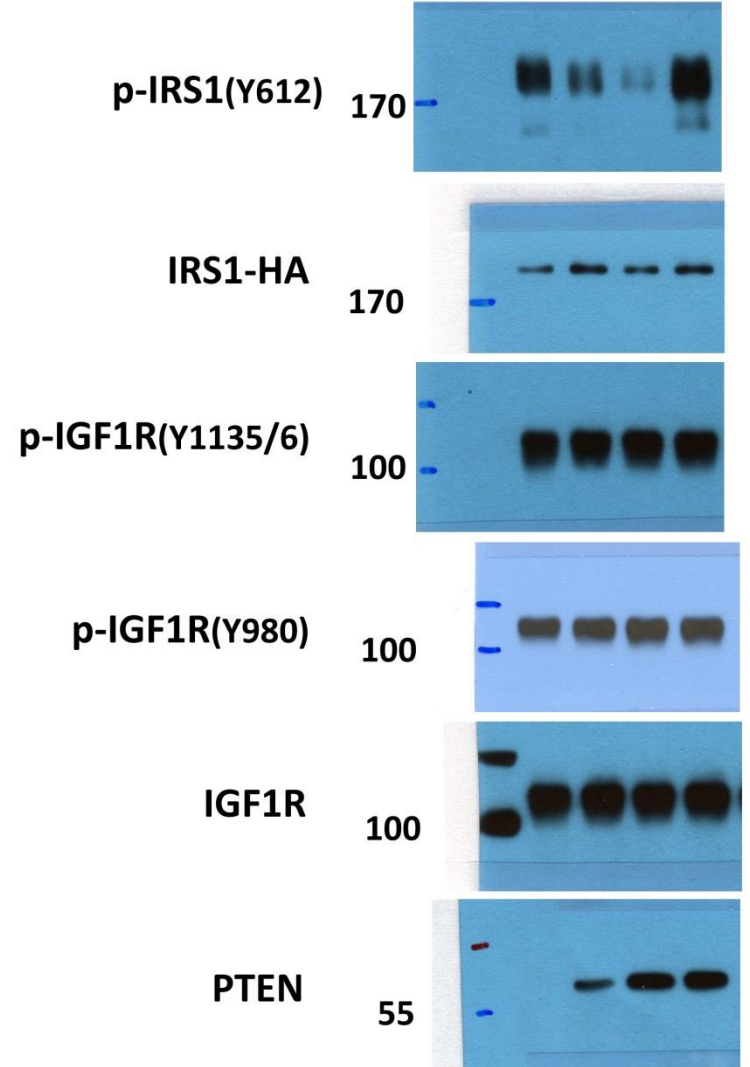



Figure 3d

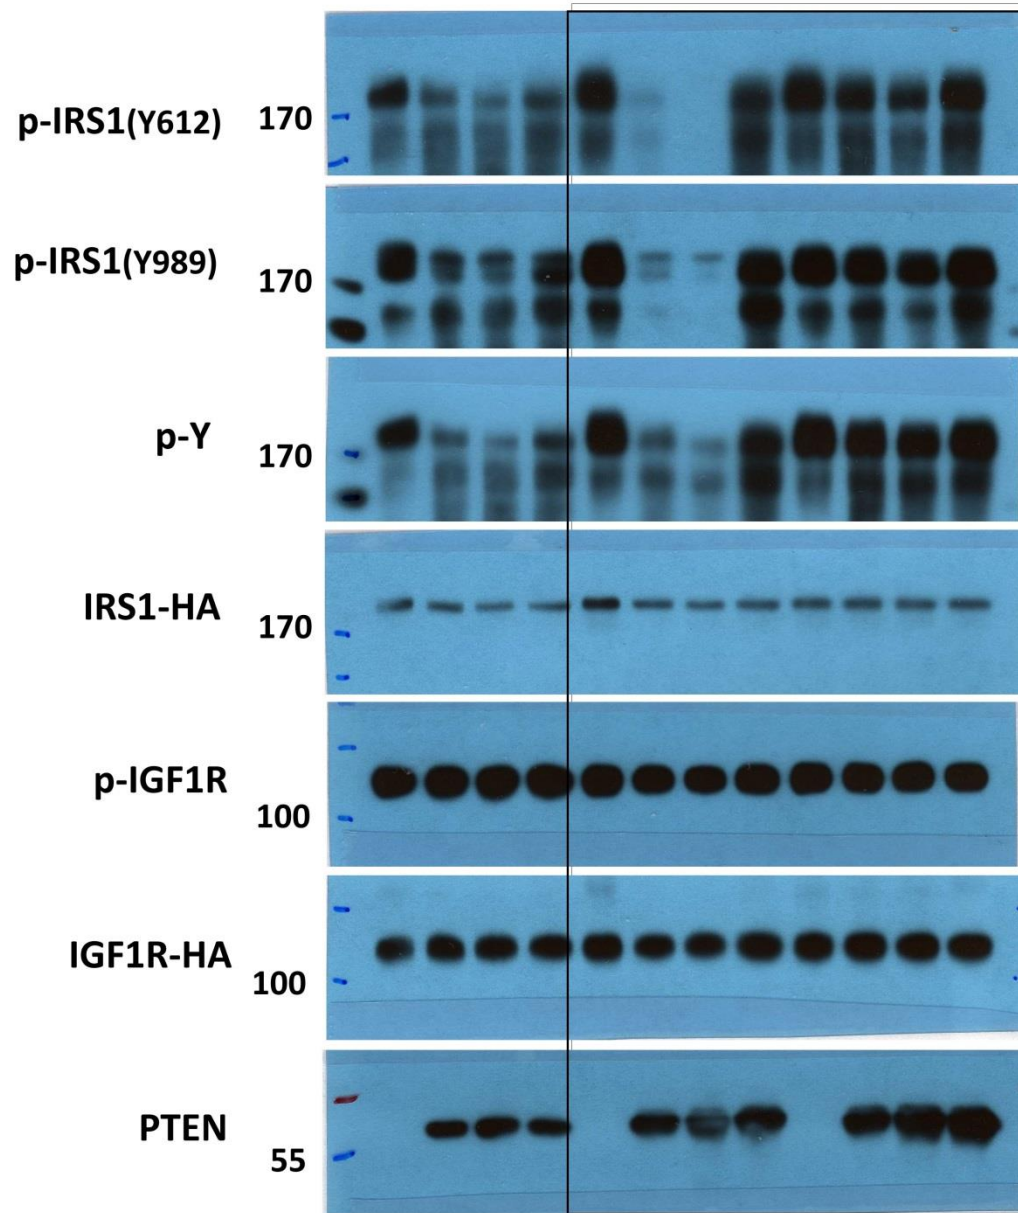

Figure 4a

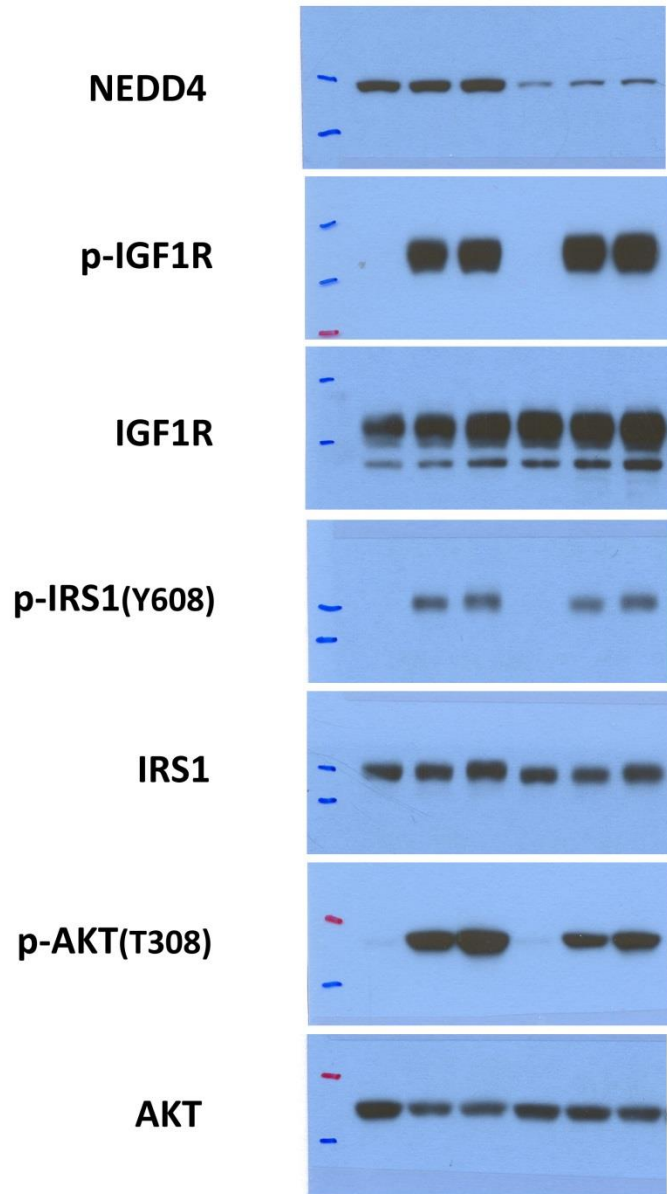

Figure 4b

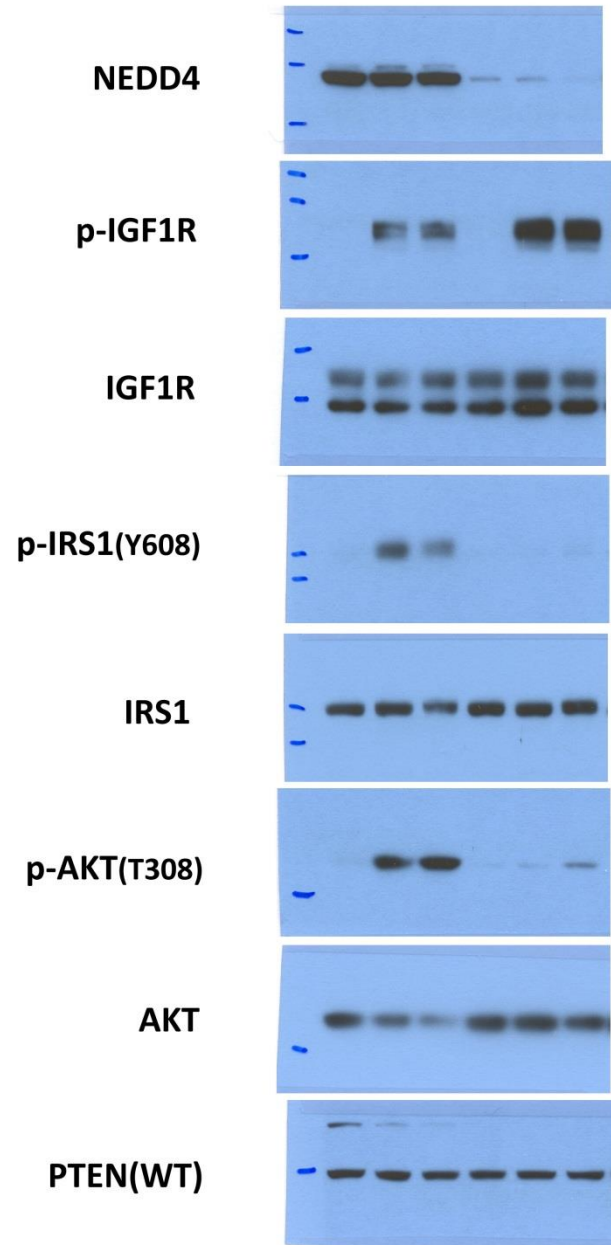

Figure 4c

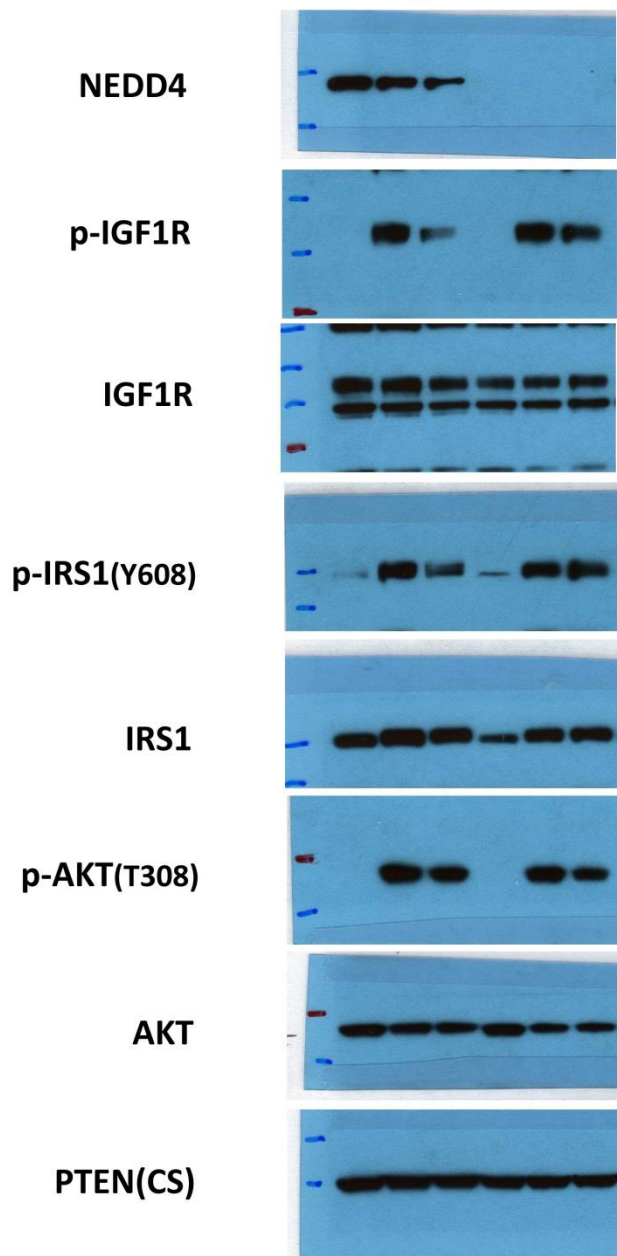

Figure 4d

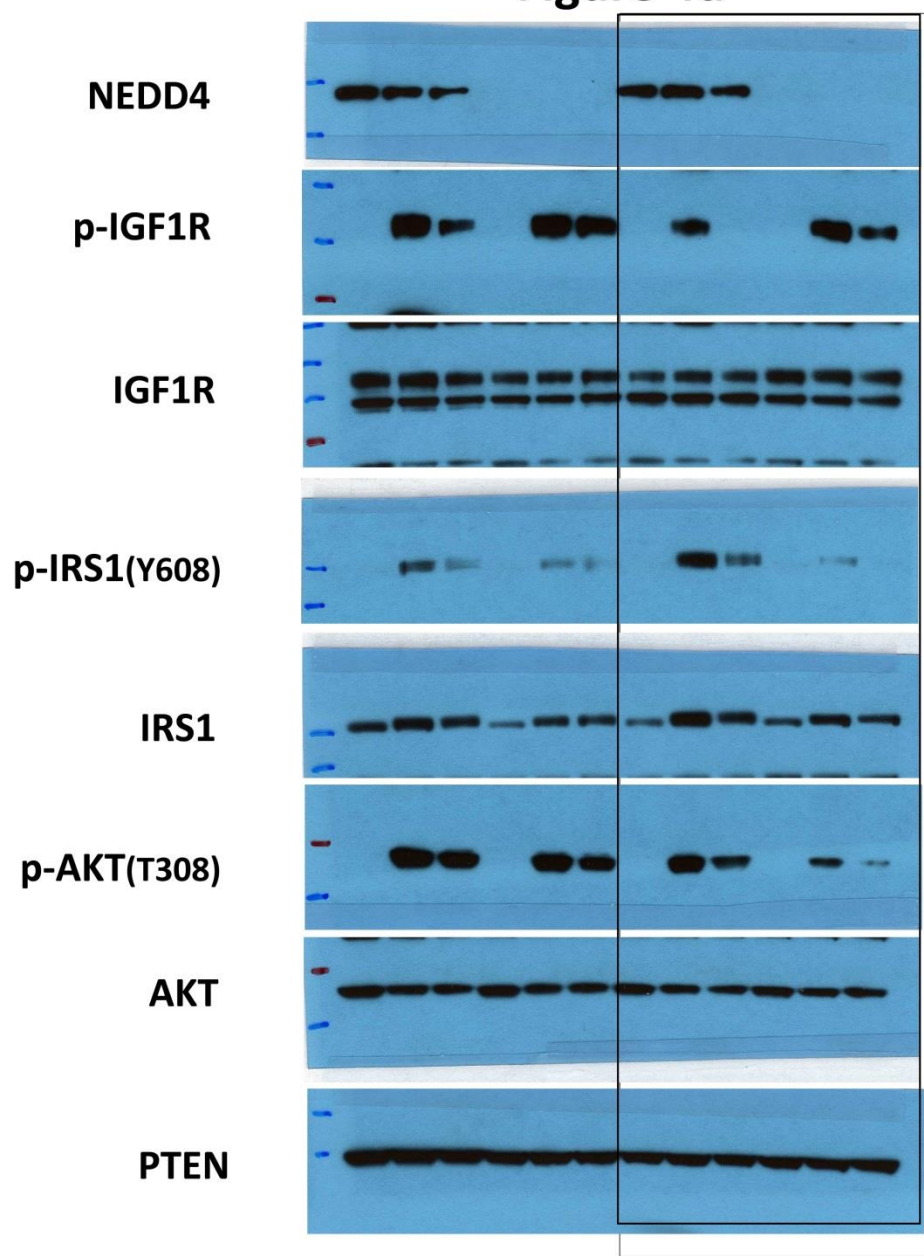



**Figure 4f**

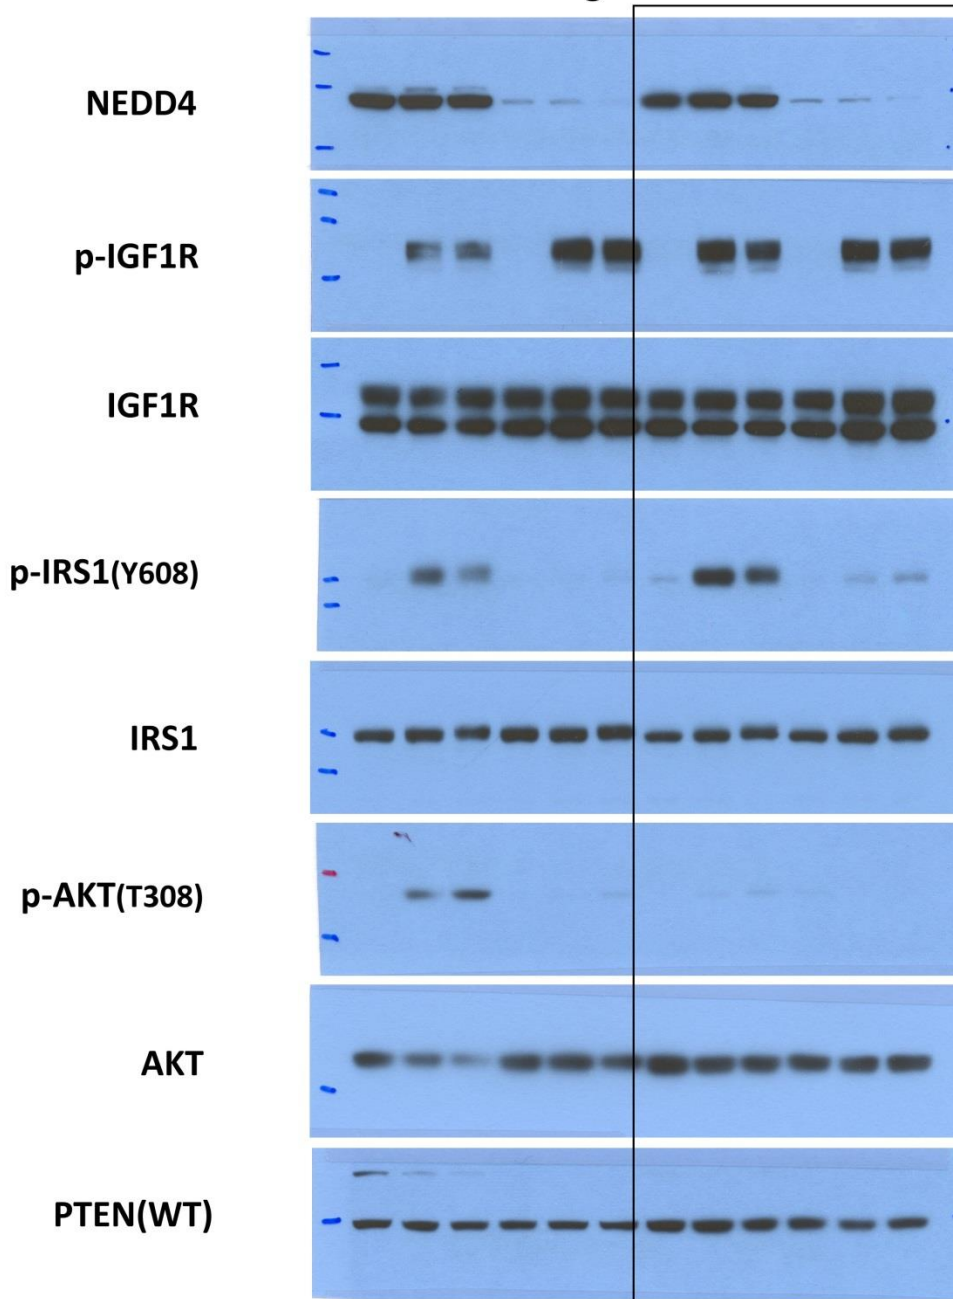

Figure 4g

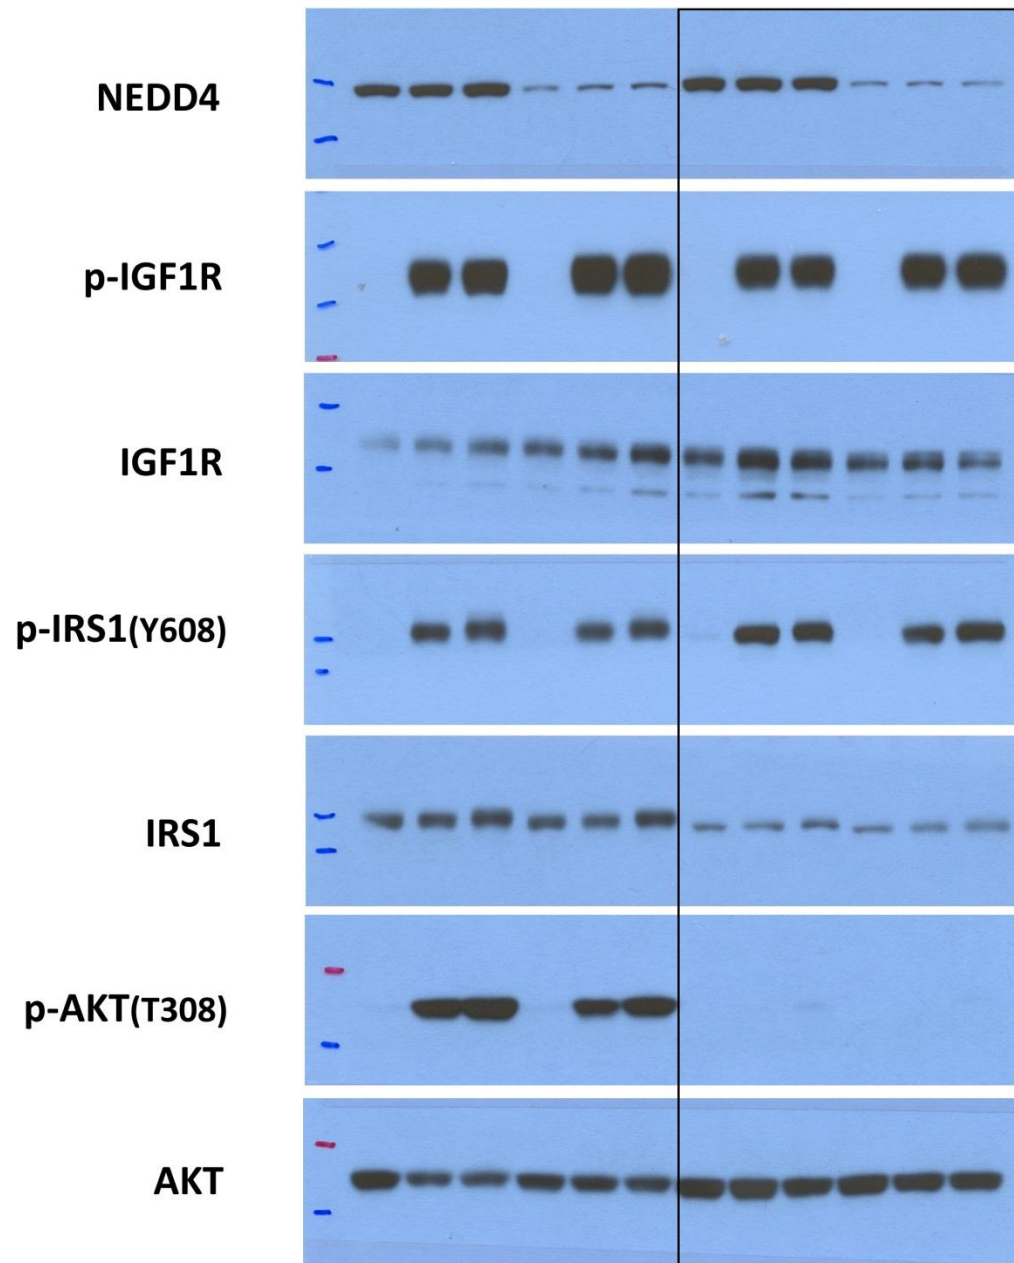

Figure 5a

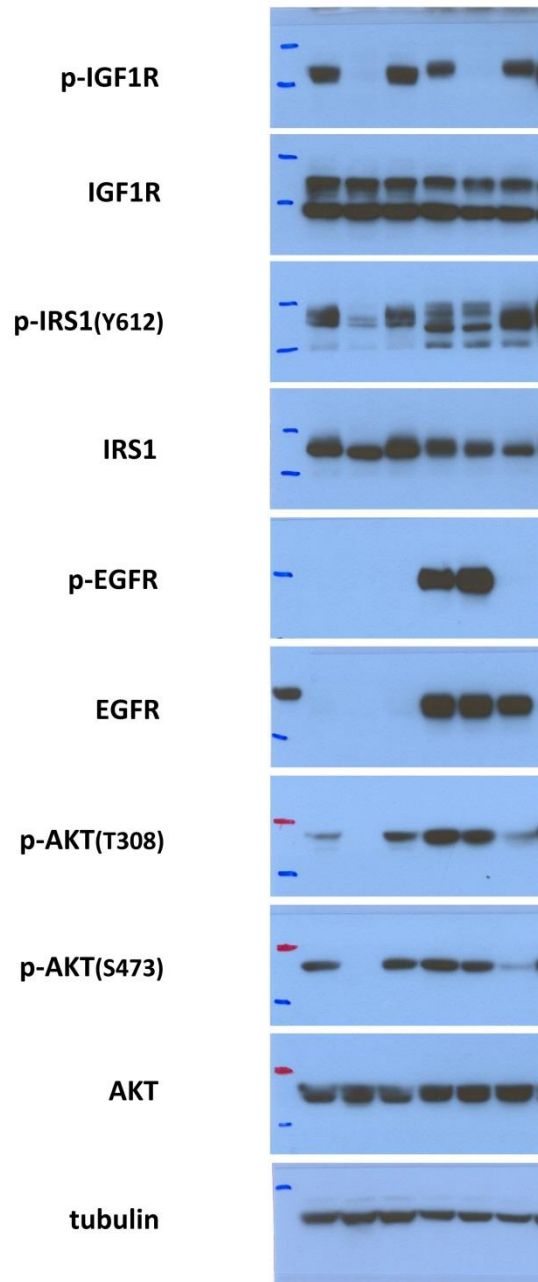

Figure 5b

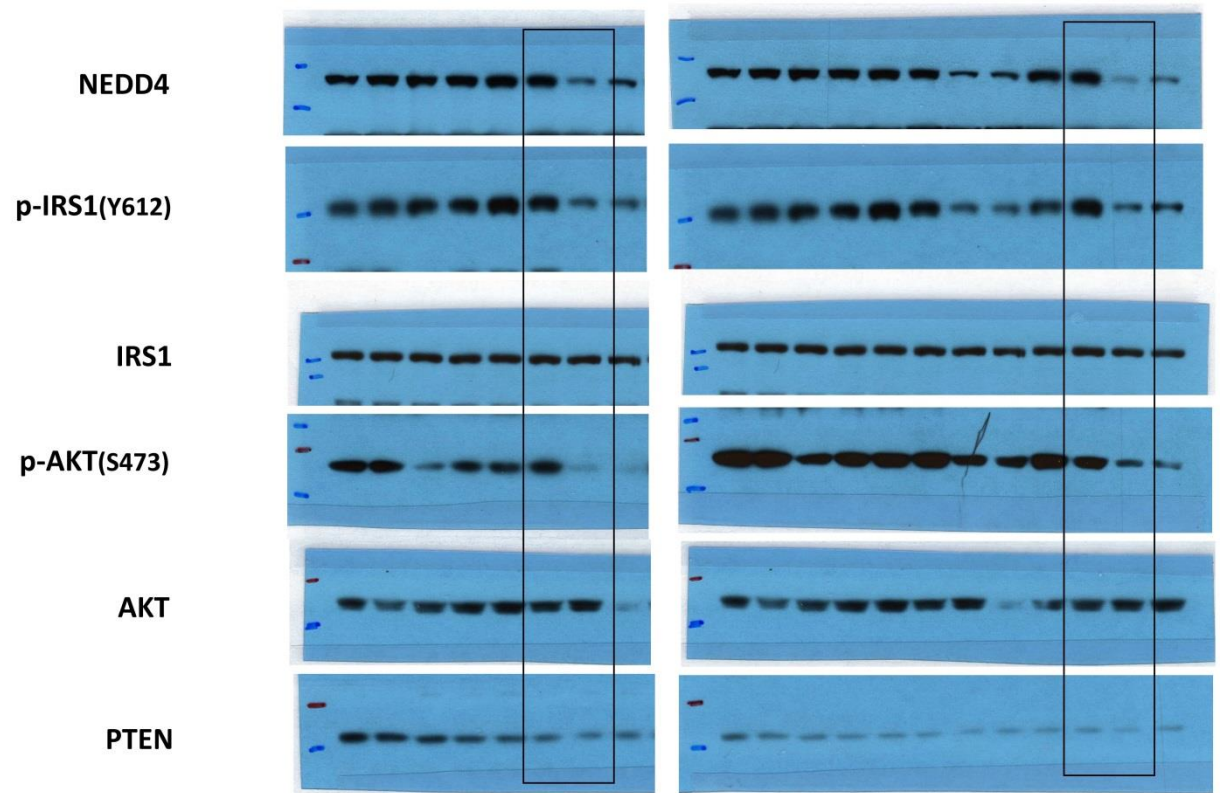



**Figure 5c**

**NEDD4**

**p-AKT(S473)**

**AKT**

**PTEN**

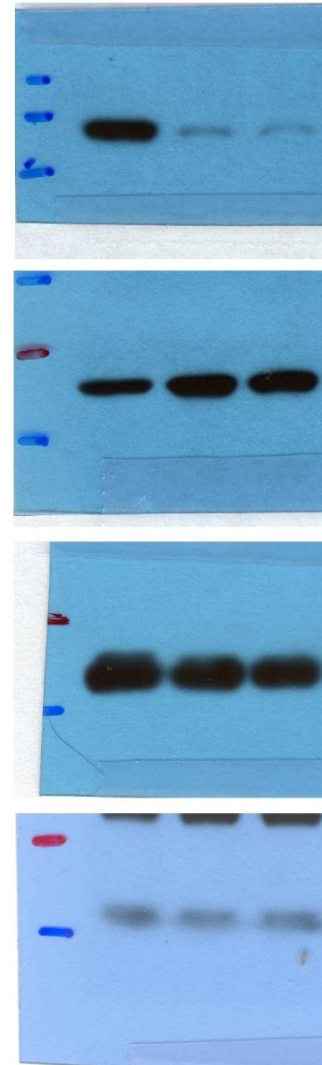

Supplement: NIHMS603735-supplement-DataSet.pdf [file NIHMS603735-supplement-DataSet.pdf]
